# Supplementary material for: The Pathogenic Properties of a Novel and Conserved Gene Product, KerV, in Proteobacteria
Source: PubMed Central journal article supplement (PMC2744870; doi:10.1371/journal.pone.0007167), 2009-09-25
Supplement: pone.0007167.s001.pdf [file pone.0007167.s001.pdf]

**Table S1. Raw data from *Dictyostelium* phagocytosis experiments.**

| Number of clear zones | Exp. 1 | Exp. 1 | Exp. 1 | Exp. 2 | Exp. 2 | Exp. 2 | Exp. 3 | Exp. 3 | Exp. 3 |
|-----------------------|--------|--------|--------|--------|--------|--------|--------|--------|--------|
|                       | Rep. 1 | Rep. 2 | Rep. 3 | Rep. 1 | Rep. 2 | Rep. 3 | Rep. 1 | Rep. 2 | Rep. 3 |
| PA14                  | 1      | 1      | 1      | 1      | 2      | 1      | 1      | 2      | 1      |
| <i>P.a.-kerV</i>      | 5      | 5      | 5      | 5      | 5      | 5      | 5      | 5      | 5      |
| <i>P.a.-kerV-C</i>    | 2      | 2      | 2      | 2      | 2      | 2      | 2      | 2      | 2      |
| <i>lasR</i>           | 8      | 8      | 8      | 8      | 9      | 8      | 8      | 8      | 8      |

Note: Experiments 1 and 2 were carried out with *Dictyostelium discoideum* strain AX4 and Experiment 3 with strain DH1-10.
